# Supplementary material for: The Heterogeneous Habitat of Taiga Forests Changes the Soil Microbial Functional Diversity
Source: MDPI journal article supplement (doi:10.3390/microorganisms12050959), 2024-05-10
Supplement: s1 [file s1]

## Supplementary materials:

**Table S1.** Grouping situation of taiga forests. All data are displayed as mean  $\pm$  standard error ( $n = 3$ ), and different letters in the same column denotes significant difference in taiga forests with different important values ( $p < 0.05$ ).

| Experimental group | Important value                |
|--------------------|--------------------------------|
| L1                 | 0.434 $\pm$ 0.009 <sup>e</sup> |
| L2                 | 0.481 $\pm$ 0.007 <sup>d</sup> |
| L3                 | 0.514 $\pm$ 0.012 <sup>c</sup> |
| L4                 | 0.544 $\pm$ 0.007 <sup>b</sup> |
| L5                 | 0.585 $\pm$ 0.009 <sup>a</sup> |

**Table S2.** Differences in soil physical and chemical properties in taiga forests. All data are displayed as mean  $\pm$  standard error ( $n = 3$ ), and different letters in the same column denotes significant difference in taiga forests with different important values ( $p < 0.05$ ).

| Experimental Group | TN (g/kg)                    | AK (mg/kg)                     | AP (mg/kg)                    | AN (mg/kg)                    | SOC (g/kg)                     | MBC (mg/kg)                    | pH                           | WC (%)                         | C/N                                                  |
|--------------------|------------------------------|--------------------------------|-------------------------------|-------------------------------|--------------------------------|--------------------------------|------------------------------|--------------------------------|------------------------------------------------------|
| L1                 | 2.14 $\pm$ 0.02 <sup>b</sup> | 137.44 $\pm$ 0.92 <sup>c</sup> | 20.23 $\pm$ 0.08 <sup>e</sup> | 67.57 $\pm$ 0.13 <sup>c</sup> | 73.66 $\pm$ 1.46 <sup>a</sup>  | 200.77 $\pm$ 0.09 <sup>a</sup> | 5.48 $\pm$ 0.01 <sup>a</sup> | 31.16 $\pm$ 1.07 <sup>b</sup>  | 34.3 <sup>9 <math>\pm</math> 0.73<sup>a</sup></sup>  |
| L2                 | 2.15 $\pm$ 0.02 <sup>b</sup> | 112.21 $\pm$ 0.68 <sup>e</sup> | 45.25 $\pm$ 2.02 <sup>d</sup> | 69.47 $\pm$ 0.17 <sup>c</sup> | 55.54 $\pm$ 0.33 <sup>b</sup>  | 170.70 $\pm$ 0.06 <sup>b</sup> | 5.14 $\pm$ 0.01 <sup>b</sup> | 34.77 $\pm$ 0.53 <sup>ab</sup> | 25.8 <sup>0 <math>\pm</math> 0.29<sup>b</sup></sup>  |
| L3                 | 2.27 $\pm$ 0.01 <sup>a</sup> | 191.49 $\pm$ 0.97 <sup>a</sup> | 57.16 $\pm$ 0.65 <sup>c</sup> | 79.68 $\pm$ 1.46 <sup>b</sup> | 42.18 $\pm$ 0.53 <sup>c</sup>  | 147.77 $\pm$ 0.03 <sup>c</sup> | 5.05 $\pm$ 0.00 <sup>c</sup> | 36.35 $\pm$ 2.35 <sup>a</sup>  | 18.5 <sup>8 <math>\pm</math> 0.27<sup>c</sup></sup>  |
| L4                 | 2.29 $\pm$ 0.00 <sup>a</sup> | 188.15 $\pm$ 0.62 <sup>b</sup> | 61.56 $\pm$ 1.34 <sup>b</sup> | 96.13 $\pm$ 1.17 <sup>a</sup> | 40.29 $\pm$ 0.11 <sup>cd</sup> | 139.67 $\pm$ 0.15 <sup>d</sup> | 4.41 $\pm$ 0.01 <sup>d</sup> | 36.06 $\pm$ 1.18 <sup>a</sup>  | 17.5 <sup>9 <math>\pm</math> 0.05<sup>cd</sup></sup> |
| L5                 | 2.31 $\pm$ 0.01 <sup>a</sup> | 131.45 $\pm$ 0.70 <sup>d</sup> | 77.38 $\pm$ 0.75 <sup>a</sup> | 98.35 $\pm$ 0.70 <sup>a</sup> | 39.41 $\pm$ 0.22 <sup>d</sup>  | 116.40 $\pm$ 0.20 <sup>e</sup> | 4.31 $\pm$ 0.00 <sup>e</sup> | 36.86 $\pm$ 1.08 <sup>a</sup>  | 17.0 <sup>9 <math>\pm</math> 0.07<sup>d</sup></sup>  |
